# Supplementary material
Source: publisher site journal article supplement (https://www.dovepress.com/article/451960)
Supplement: Supplementary file 1 [file get_supplementary_file.php]

**Supplementary material**

Supplementary figure 1. Scree plot of unrotated exploratory factor analysis


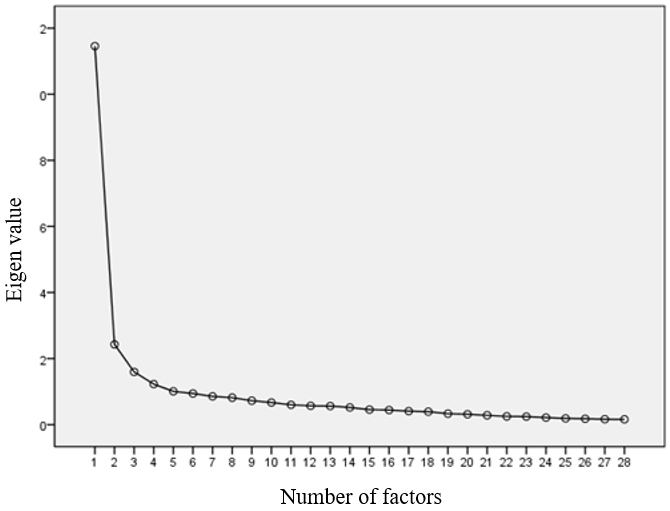


Supplementary table 1. The initial 29 homesickness items pool

| Items |
| --- |
| hs1 I feel full of power when thinking about hometown |
| hs2 I often enjoy local entertainment programs in my hometown |
| hs3 Comparing to here, I'd rather do what I am doing in my hometown |
| hs4 I often pay attention to the recent situation in my hometown |
| hs5 I hope to return to my hometown for the rest of my life |
| hs6 I feel warming when thinking about hometown |
| hs7 Once I return my hometown, I may not want to come here again |
| hs8 I often talk to others about my hometown |
| hs9 I feel empty after leaving my hometown |
| hs10 I think about what I would do if I returned to my hometown |
| hs11 I will try to speak my hometown dialect to others if possible |
| hs12 I miss the lively feelings in my hometown |
| hs13 I often think of things about my hometown |
| hs14 I identify with my hometown |
| hs15 I keep in frequent contact with my family and friends in my hometown |
| hs16 I feel safe in my hometown |
| hs17 My hometown means a lot to me |
| hs18 I feel the tight connection between myself and my hometown |
| hs19 I often feel lonely after leaving my hometown |
| hs20 My hometown has a unique place in my heart |
| hs21 I get excited every time I think about going back to my hometown |
| hs22 I regret leaving my hometown |
| hs23 I usually follow the traditional customs of my hometown |
| hs24 I miss my family and friends in my hometown |
| hs25 I often go to eat local food in my hometown |
| hs26 My hometown gives me a sense of belonging |
| hs27 Once I think of my hometown, my heart feels at peace |
| hs28 I often feel depressed after leaving my hometown |
| hs29 I will keep some things from my hometown as souvenirs |

Supplementary table 2. Descriptive statistics and group comparison of homesickness for elderly

|  | | *n* | *M（SD）* | *df* | *F* | *p* |
| --- | --- | --- | --- | --- | --- | --- |
| Gender | Male | 85 | 63.27（17.566） | 1 | 2.958 | 0.086 |
|  | Female | 257 | 66.86（16.085） |  |  |  |
| Age | ≤ 65 years | 148 | 68.16（16.316） | 2 | 5.230** | 0.006 |
|  | 66 - 75 years | 173 | 65.28（16.182） |  |  |  |
|  | > 75years | 21 | 56.24（17.346） |  |  |  |
| Occupation | Manual | 204 | 68.35（15.746） | 1 | 10.780*** | 0.001 |
|  | Mental | 138 | 62.46（17.042） |  |  |  |
| Education | Elementary and Below | 111 | 67.79（16.365） | 3 | 4.747** | 0.003 |
| Junior | 87 | 69.09（14.879） |  |  |  |
| Senior | 101 | 64.39（17.118） |  |  |  |
| College and above | 43 | 58.67（16.485） |  |  |  |
| Marriage | Married | 271 | 66.16（16.282） | 2 | 0.183 | 0.833 |
|  | Divorced | 16 | 66.88（18.442） |  |  |  |
|  | Widowed | 55 | 64.78（17.315） |  |  |  |
| Monthly income  (CNY) | <1000 | 108 | 68.22（15.872） | 3 | 3.788* | 0.011 |
| 1000-3000 | 105 | 68.10（16.819） |  |  |  |
| 3000-5000 | 79 | 61.99（16.289） |  |  |  |
| > 5000 | 42 | 61.64（16.926） |  |  |  |
| Migration distance | Cross city | 55 | 61.69（16.089） | 1 | 4.448* | 0.036 |
|  | Cross provincial | 287 | 66.79（16.493） |  |  |  |
| Purpose | Take care of relatives | 236 | 68.29（15.887） | 1 | 15.641*** | 0.000 |
|  | Others | 106 | 60.81（16.783） |  |  |  |
| Length of arrival | < 3 years | 50 | 69.54（17.040） | 3 | 11.198*** | 0.000 |
| 3-10 years | 136 | 69.16（15.657） |  |  |  |
| 10-20 years | 89 | 66.43（15.140） |  |  |  |
| > 20 years | 67 | 56.22（16.085） |  |  |  |
| From rural / urban | Rural | 179 | 69.19（15.690） | 1 | 14.855*** | 0.000 |
| Urban | 163 | 62.44（16.715） |  |  |  |
| Living with partner | Yes | 137 | 66.50（15.665） | 1 | 0.238 | 0.626 |
| No | 205 | 65.61（17.083） |  |  |  |
| Living with child | Yes | 288 | 67.02（16.314） | 1 | 7.467** | 0.007 |
| No | 54 | 60.39（16.592） |  |  |  |
| Living with grandchild | Yes | 150 | 69.71（15.623） | 1 | 14.260*** | 0.000 |
| No | 192 | 63.05（16.636） |  |  |  |
| Real estate in hometown | Yes | 256 | 67.56（15.689） | 1 | 9.653** | 0.002 |
| No | 86 | 61.24（18.033） |  |  |  |

*n* = 342；**p* < 0.05；***p* < 0.01；****p* < 0.001

Supplementary table 3. The coding of demographic variables

| Subject | Category | Coding |
| --- | --- | --- |
| Gender | Male | 1 |
|  | Female | 2 |
| Age | ≤ 65 years | 1 |
|  | 66 - 75 years | 2 |
|  | > 75years | 3 |
| Occupation | Manual | 1 |
|  | Mental | 2 |
| Education | Elementary and Below | 1 |
|  | Junior | 2 |
|  | Senior | 3 |
|  | College and above | 4 |
| Marriage | Married | 1 |
|  | Divorced | 2 |
|  | Widowed | 3 |
| Monthly income (CNY) | <1000 | 1 |
| 1000-3000 | 2 |
| 3000-5000 | 3 |
| > 5000 | 4 |
| Migration distance | Cross city | 1 |
|  | Cross provincial | 2 |
| Purpose | Take care of relatives | 1 |
|  | Others | 2 |
| Length of arrival | < 3 years | 1 |
|  | 3-10 years | 2 |
|  | 10-20 years | 3 |
|  | > 20 years | 4 |
| From rural / urban | Rural | 1 |
|  | Urban | 2 |
| living with partner | Yes | 1 |
|  | No | 2 |
| living with child | Yes | 1 |
|  | No | 2 |
| Living with grandchild | Yes | 1 |
|  | No | 2 |
| Real estate in hometown | Yes | 1 |
|  | No | 2 |
